# Supplementary figures and images for: γδ T Cells Contribute to Injury in the Developing Brain
Source: PubMed Central journal article supplement — Am J Pathol. 2018 Mar;188(3):757–67. doi: 10.1016/j.ajpath.2017.11.012 (PMC5840494; doi:10.1016/j.ajpath.2017.11.012), 2018-03

**contralateral**

**ipsilateral**

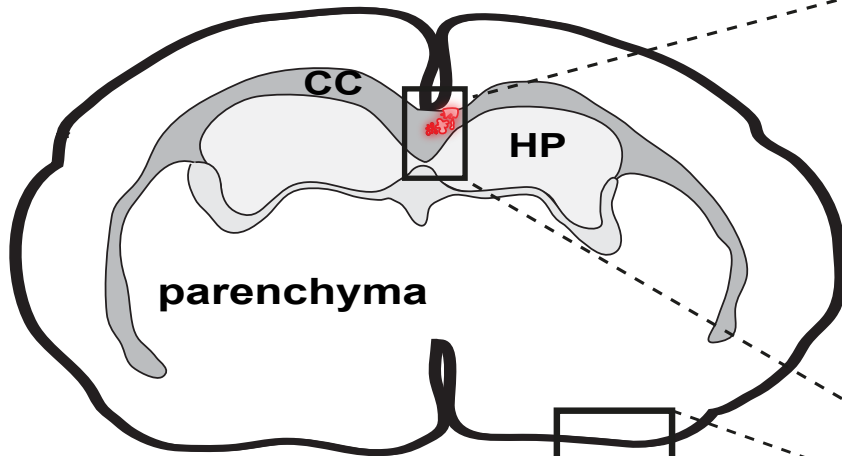

**parenchyma**

**CC**

**HP**

**meninges**

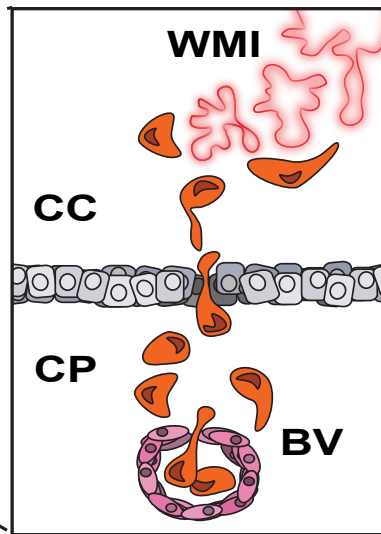

**WMI**

**CC**

**CP**

**BV**

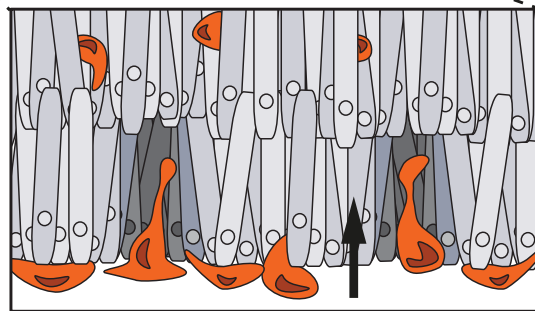

Supplement: mmc2.pdf [file mmc2.pdf]
